# Supplementary material for: Study of different extraction methods on finger print and fatty acid of raw beef fat using fourier transform infrared and gas chromatography-mass spectrometry
Source: publisher site journal article supplement (doi:10.1515/chem-2018-0109), 2018-01-01

## Supplementary Information

## Open Access

Aminullah\*, Mardiah, Hanna Sutsuga, Tetty Kemala

# Supplement: Study of different extraction methods on finger print and fatty acid of raw beef fat using fourier transform infrared and gas chromatography-mass spectrometry

## A. Soxhlet Method

File : C:\msdchem\1\data\170616-A\18.D  
Operator : rgt  
Acquired : 17 Jun 2017 5:52 using AcqMethod FFAMS5.M  
Instrument : GCMS-D  
Sample Name: LS S2  
Misc Info :  
Vial Number: 17

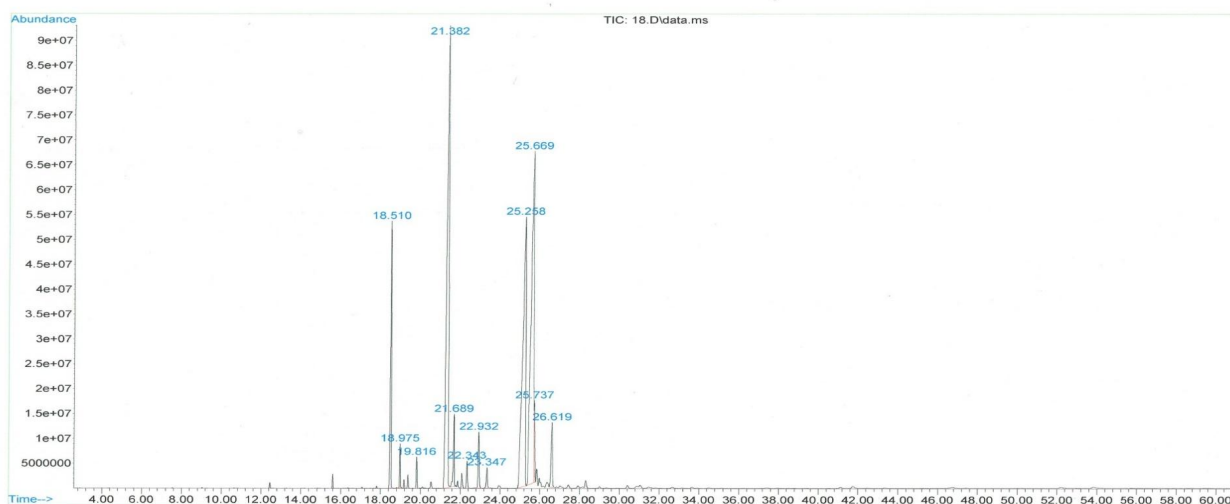

## B. Folch Method

File : C:\msdchem\1\data\170616-A\12.D  
Operator : rgt  
Acquired : 16 Jun 2017 23:11 using AcqMethod FFAMS5.M  
Instrument : GCMS-D  
Sample Name: LS F2  
Misc Info :  
Vial Number: 11

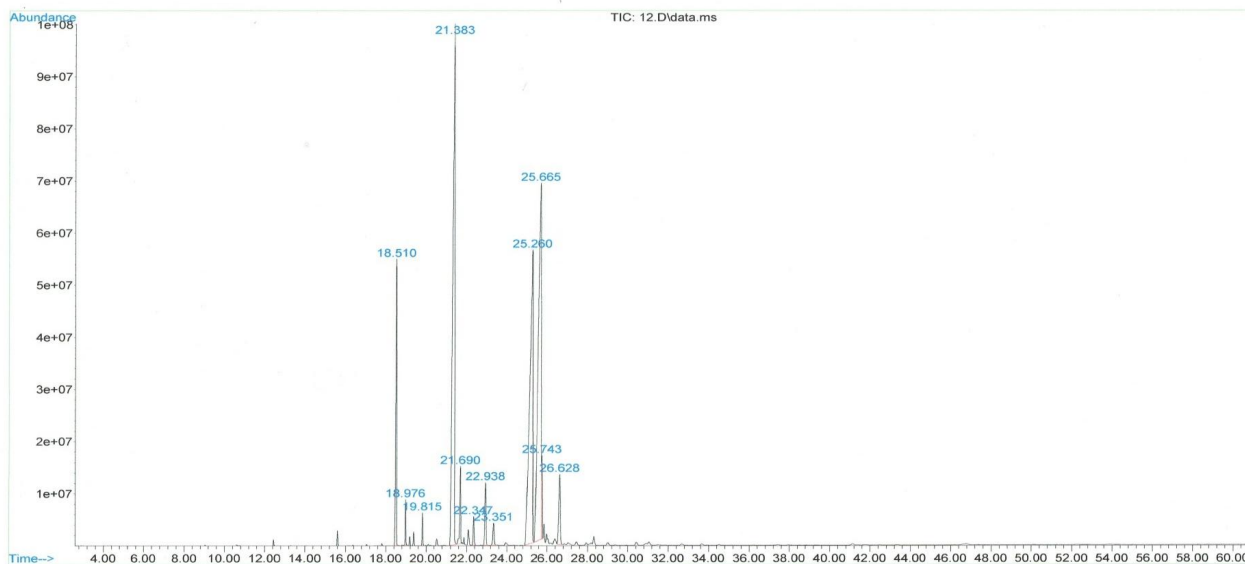

## C. Bligh and Dyer Method

File : C:\msdchem\1\data\170616-A\17.D  
Operator : rgt  
Acquired : 17 Jun 2017 4:45 using AcqMethod FFAMS5.M  
Instrument : GCMS-D  
Sample Name: LS BD1  
Misc Info :  
Vial Number: 16

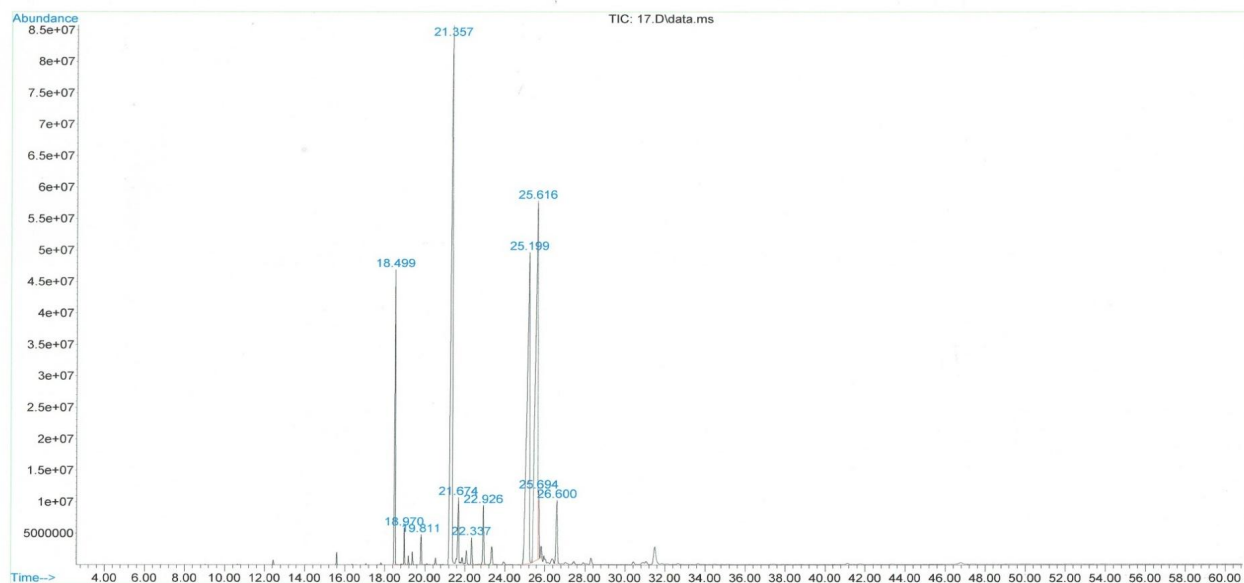

## D. Hara and Radin Method

File : C:\msdchem\1\data\170616-A\15.D  
Operator : rgt  
Acquired : 17 Jun 2017 2:31 using AcqMethod FFAMS5.M  
Instrument : GCMS-D  
Sample Name: LS HR1  
Misc Info :  
Vial Number: 14

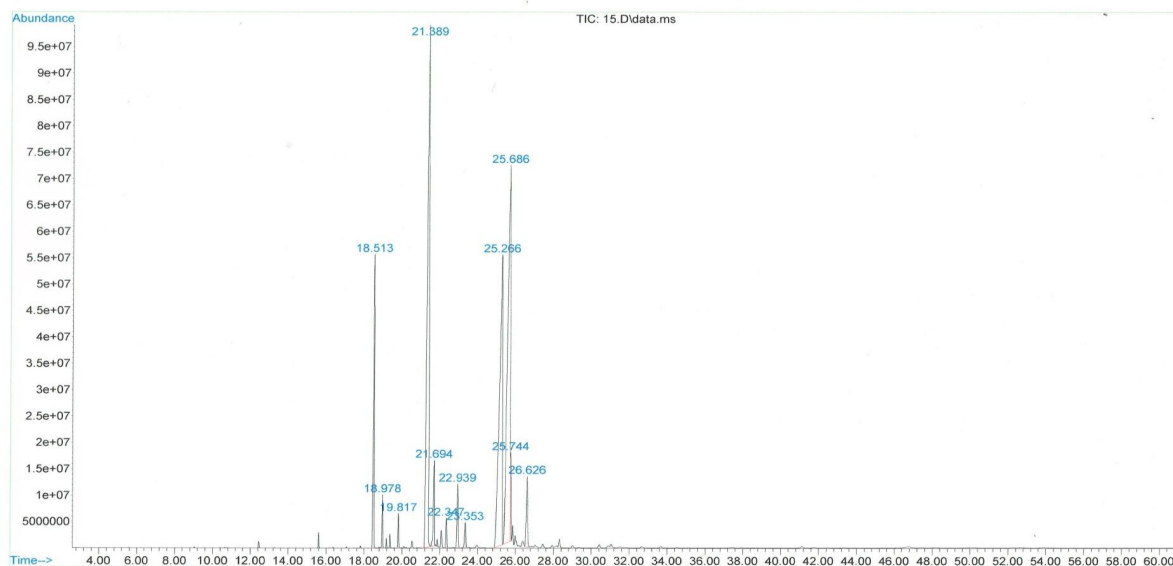

## E. Standard FAME

File : C:\msdchem\1\data\170616-A\02.D  
Operator : rgt  
Acquired : 16 Jun 2017 11:58 using AcqMethod FFAMS5.M  
Instrument : GCMS-D  
Sample Name: Fame 10000  
Misc Info :  
Vial Number: 26

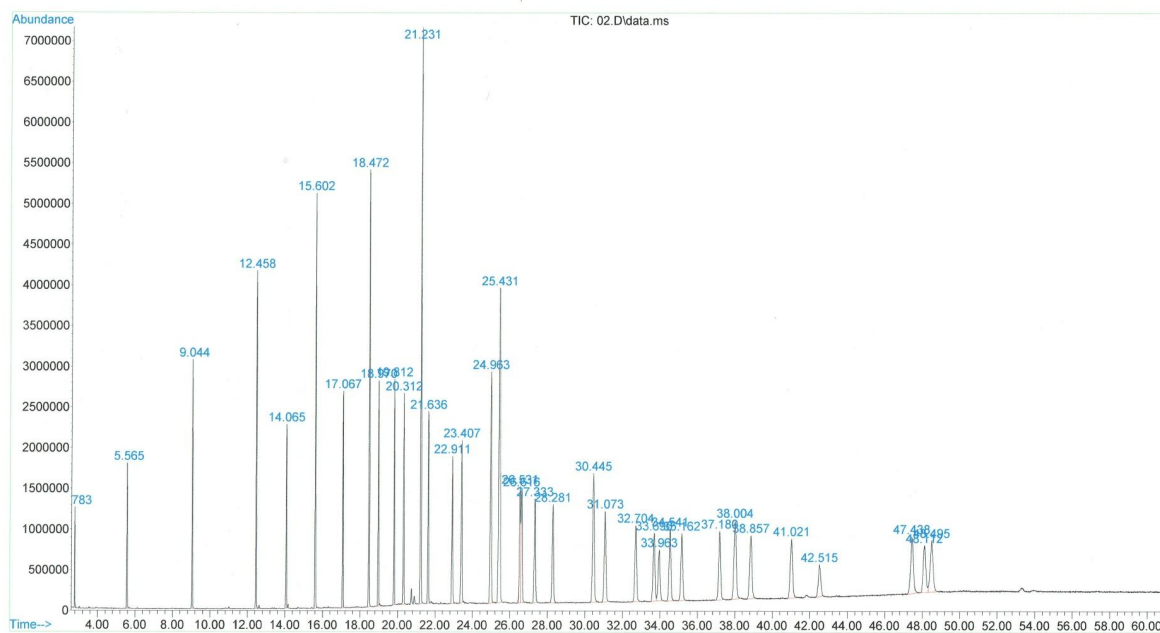

Supplement: Supplementary file 1 [file chem-2018-0109_sm.pdf]
